# Supplementary material for: Photoactuation and thermal isomerisation mechanism of cyanoazobenzene-based liquid crystal elastomers
Source: Royal Society of Chemistry journal article supplement (doi:10.1039/c4cp00446a), 2014-01-01
Supplement: c4cp00446a1.pdf [file c4cp00446a1.pdf]

## Electronic Supplementary information

### Photoactuation and thermal isomerisation mechanism of cyanoazobenzene-based liquid crystal elastomers

Jaume Garcia-Amorós<sup>1</sup>, Manuel Martínez<sup>2</sup>, Heino Finkelmann<sup>3</sup> and Dolores Velasco<sup>1,\*</sup>

<sup>1</sup>*Grup de Materials Orgànics, Institut de Nanociència i Nanotecnologia (IN<sup>2</sup>UB), Departament de Química Orgànica, Universitat de Barcelona, Martí i Franquès 1, E-08028, Barcelona, Spain.*

<sup>2</sup>*Departament de Química Inorgànica, Facultat de Química, Universitat de Barcelona, Martí i Franquès, 1-11, E-08028, Barcelona, Spain.*

<sup>3</sup>*Albert-Ludwigs-Universität Freiburg, Institut für Makromolekulare Chemie, Hermann-Staudinger-Haus, Stefan-Meier-Straße 31, D-79104 Freiburg, Germany*

---

#### Materials and general instrumentation

All reagents for synthesis were used as received without further purification. DMF (Fluka) was stored over activated 4Å molecular sieves under inert atmosphere. Flash chromatography was carried out over silica gel (SDS, 230-240 mesh). Melting points were determined by polarized optical microscopy (POM) using a Nikon Eclipse polarizing microscope equipped with a Linkam THMS 600 hot stage and a Linkam CI 93 programmable temperature controller at a scan rate of 5 °C·min<sup>-1</sup>. FT-IR spectra were registered in a Nicolet 510 FT-IR spectrophotometer from Thermo Scientific. Electronic spectra were recorded in a Varian Cary 500E UV-Vis-NIR spectrophotometer. <sup>1</sup>H NMR (200 MHz) and <sup>13</sup>C NMR (50 MHz) spectra were collected on a Varian Gemini spectrophotometer. NMR spectra have been processed with the MestRec commercially available software. HRMS was performed in a LC/MSD-TOF Agilent Technologies apparatus by means of the electrospray (ESI-MS) technique.

#### Synthesis of the azo monomer AZO-CN

4-cyanoazophenol (500 mg) and NaH (197 mg, 60 % dispersion in mineral oil) were dissolved in anhydrous DMF (15 cm<sup>3</sup>) under inert atmosphere. The reaction mixture was heated up to 150 °C and then, a solution of 6-bromo-1-hexene (365 mg) in anhydrous DMF (2 cm<sup>3</sup>) was added. The reaction was stirred at 150 °C for 24 hours. After, the reaction was cooled to room temperature and diluted with water. The product was extracted with CH<sub>2</sub>Cl<sub>2</sub>. The combined organic extract was washed several times with water, dried over anhydrous sodium sulphate, filtered and the solvent was removed under reduced pressure. The crude was purified by flash column chromatography using CH<sub>2</sub>Cl<sub>2</sub> as eluent. **AZO-CN** was obtained as a yellow solid

(Yield = 52 %). **m.p.** (POM): 102-103 °C. **IR** (KBr)  $\nu$  3081 (C<sup>sp2</sup>-H st); 2939 (C<sup>sp3</sup>-H st); 2220 (CN st); 1597 (ar C-C st); 1250 (C-O-C st); 844 (C-O-C st) cm<sup>-1</sup>. **UV-vis** (ethanol):  $\lambda_{max}$  = 364 nm ( $\epsilon$  = 28 530 M<sup>-1</sup> cm<sup>-1</sup>). **<sup>1</sup>H NMR** (CDCl<sub>3</sub>, 200 MHz):  $\delta$  1.62 (2H, m), 1.84 (2H, m), 2.15 (2H, m), 4.07 (2H, t,  $J$  = 6.3 Hz), 4.90-5.00 (2H, m), 5.84 (1H, m), 7.02 (2H, d,  $J$  = 8.8 Hz), 7.78 (2H, d,  $J$  = 8.8 Hz), 7.94 (4H, 2  $\times$  d,  $J$  = 8.8 Hz) ppm. **<sup>13</sup>C NMR** (CDCl<sub>3</sub>, 50 MHz):  $\delta$  25.3, 28.6, 33.4, 68.2, 113.1, 114.8 (3C), 118.6, 123.0 (2C), 125.4 (2C), 133.1 (2C), 138.3, 146.6, 154.7, 162.6 ppm. **HRMS** (ESI-MS):  $m/z$  calcd. for C<sub>19</sub>H<sub>20</sub>N<sub>3</sub>O [MH<sup>+</sup>] 306.1606; found 306.1602 [MH<sup>+</sup>].

## X-Ray diffractometry

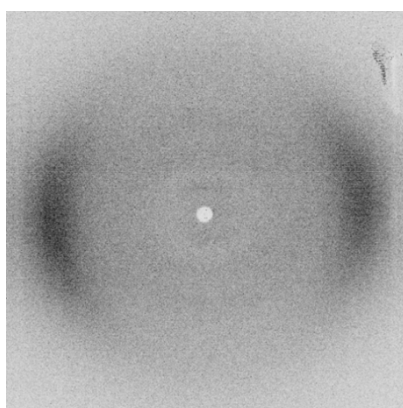

**Figure S1.** X-Ray scattering pattern for the nematic liquid single crystal elastomer **EAZO-CN**.

## Kinetic rate constants for AZO-CN and EAZO-CN

**Table S1.** Values of the observed rate constants for all the reactions studied as a function of solvent, temperature and pressure for azoderivative **AZO-CN**.

| Azocompound   | Solvent        | $P$ /atm            | $T$ /°C | $10^5 \times k^{th} /s^{-1}$ |
|---------------|----------------|---------------------|---------|------------------------------|
| <b>AZO-CN</b> | <i>ethanol</i> | 1                   | 25      | 4.6                          |
|               |                | 1                   | 35      | 15                           |
|               |                | 500                 |         | 15                           |
|               |                | 1500                |         | 15                           |
|               |                | 1                   | 45      | 43                           |
|               | <i>toluene</i> | 1                   | 25      | 3.2                          |
|               |                | 1                   | 35      | 11                           |
|               |                | 500                 |         | 13                           |
|               |                | 1500                |         | 12                           |
|               |                | 1                   | 50      | 65                           |
|               |                | 1                   | 55      | 110                          |
|               |                | <i>acetonitrile</i> | 1       | 25                           |
|               | 1              |                     | 45      | 30                           |
|               | 1              |                     | 55      | 90                           |
|               | 1              |                     | 60      | 160                          |
|               | <i>hexane</i>  | 1                   | 25      | 3.5                          |
| 1             |                | 35                  | 12      |                              |
| 1             |                | 50                  | 68      |                              |
| 1             |                | 55                  | 120     |                              |

**Table S2.** Rate constants ( $k^{\text{irrad}}$  and  $k^{\text{th}}$ ), respective characteristic times ( $\tau^{\text{irrad}}$  and  $\tau^{\text{th}}$ ) for the UV-irradiation and thermal relaxation process, respectively, and *cis* isomer population at the photostationary state at different temperatures for the nematic liquid single crystal elastomer **EAZO-CN**.

| $T$<br>/K | $k^{\text{irrad}}$<br>/s <sup>-1</sup> | $\tau^{\text{irrad}}$<br>/min | $k^{\text{th}}$<br>/s <sup>-1</sup> | $\tau^{\text{th}}$<br>/min | $\phi_{\text{cis}}$<br>/% |
|-----------|----------------------------------------|-------------------------------|-------------------------------------|----------------------------|---------------------------|
| 298       | 0.00093                                | 17.9                          | 0.00018                             | 92.6                       | 81                        |
| 303       | 0.0012                                 | 13.9                          | 0.00028                             | 59.5                       | 77                        |
| 308       | 0.0015                                 | 11.1                          | 0.00040                             | 41.7                       | 73                        |
| 313       | 0.0018                                 | 9.26                          | 0.00060                             | 27.8                       | 67                        |
| 318       | 0.0022                                 | 7.58                          | 0.00090                             | 18.5                       | 59                        |
| 323       | 0.0028                                 | 5.95                          | 0.0013                              | 12.8                       | 54                        |
| 328       | 0.0035                                 | 4.76                          | 0.0018                              | 9.25                       | 49                        |
| 333       | 0.0044                                 | 3.79                          | 0.0025                              | 6.67                       | 43                        |
